# Supplementary figures and images for: A Reference Genome of Bursaphelenchus mucronatus Provides New Resources for Revealing Its Displacement by Pinewood Nematode
Source: MDPI journal article supplement (doi:10.3390/genes11050570), 2020-05-19

Figure S2

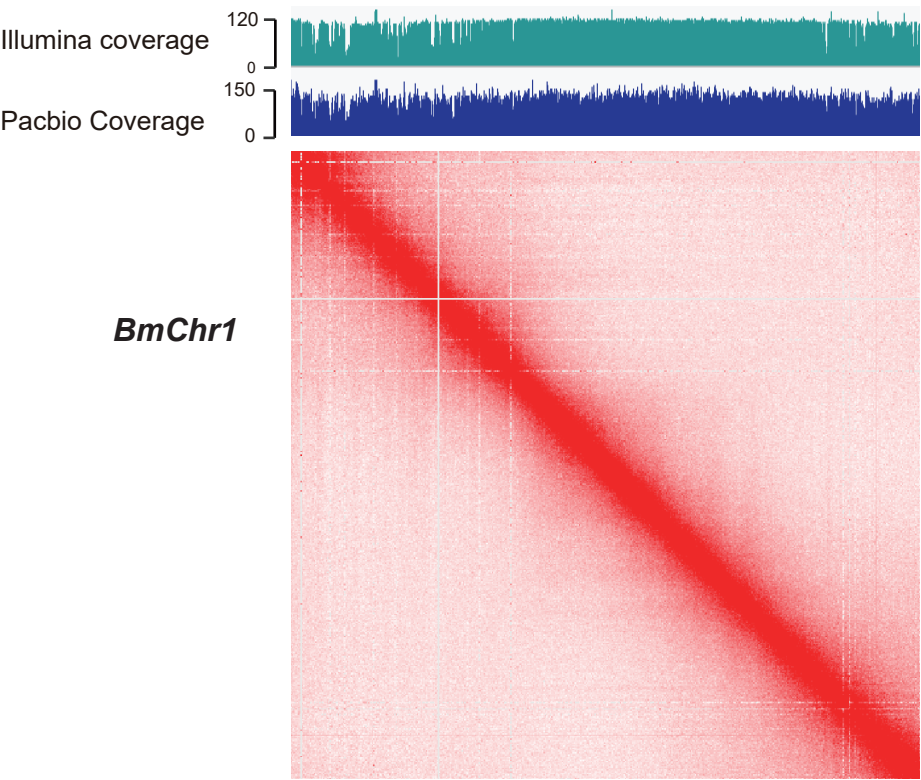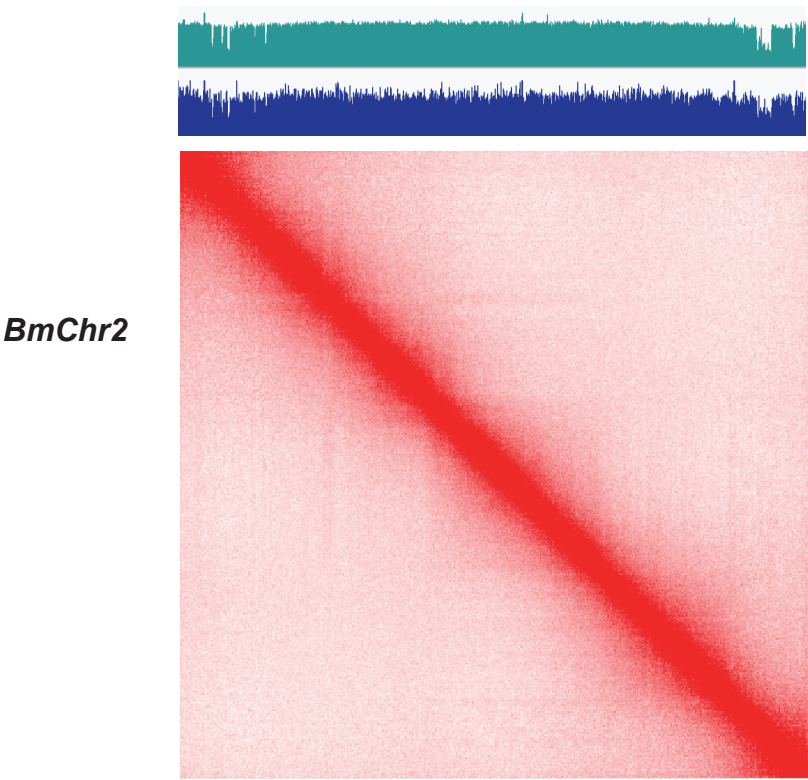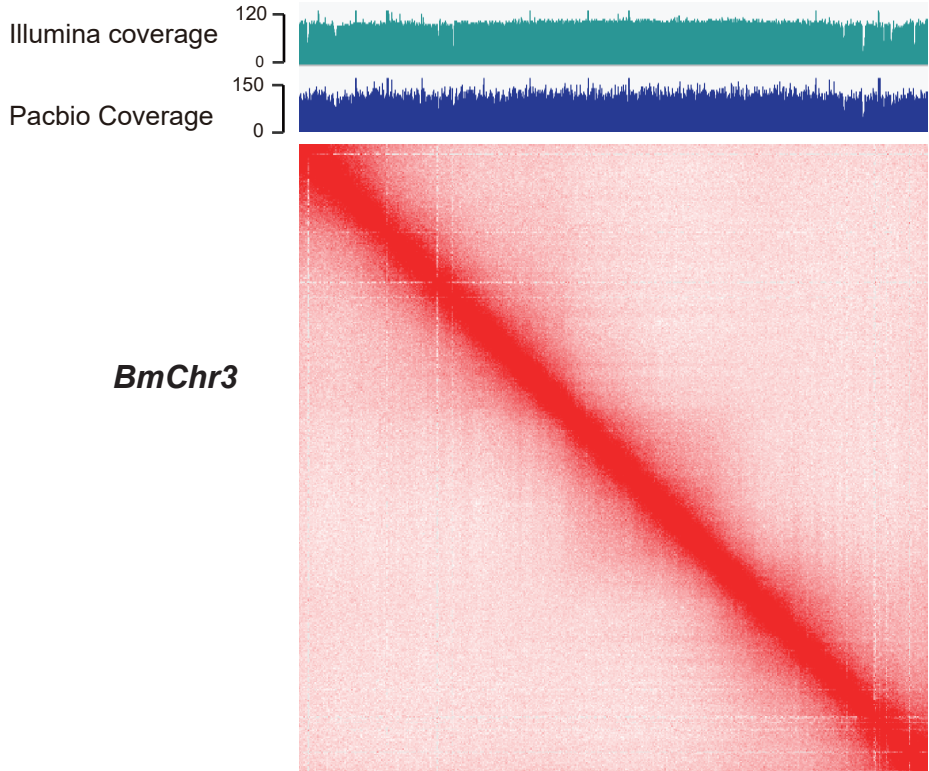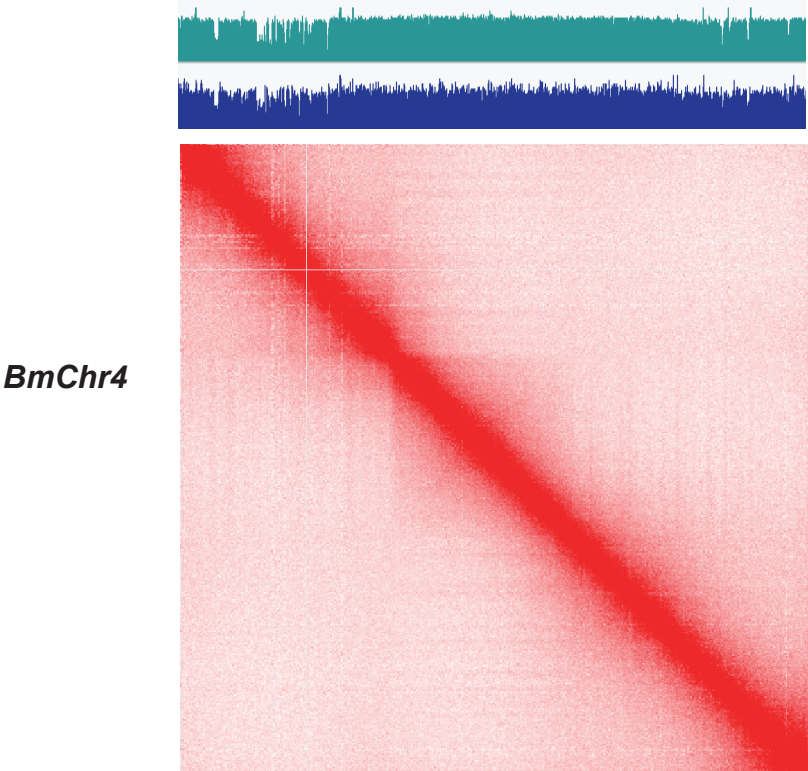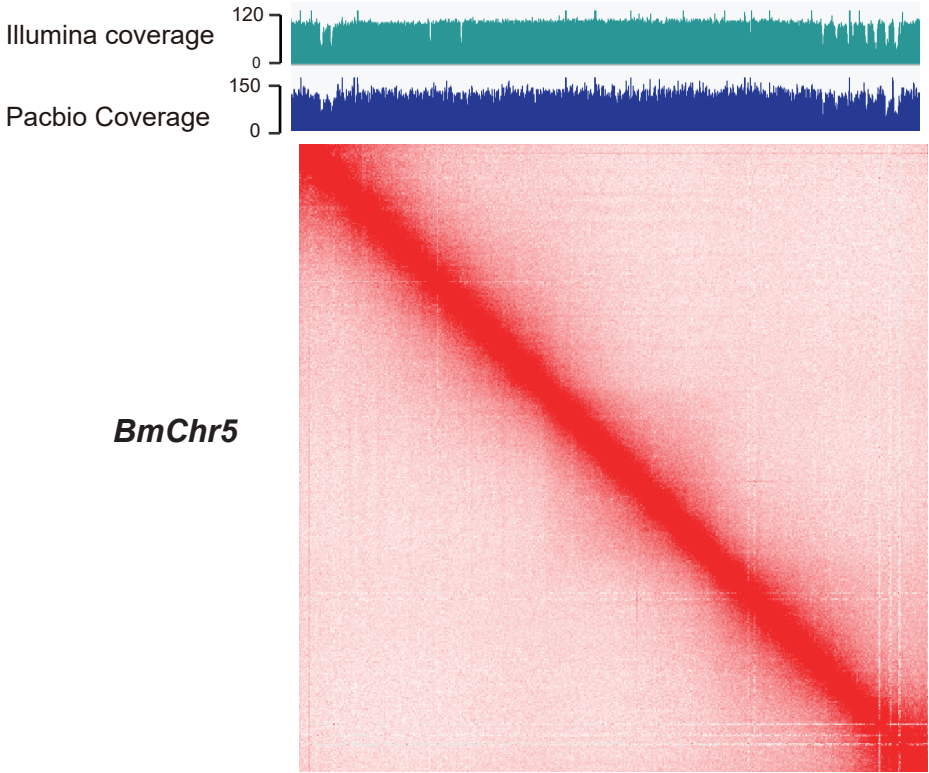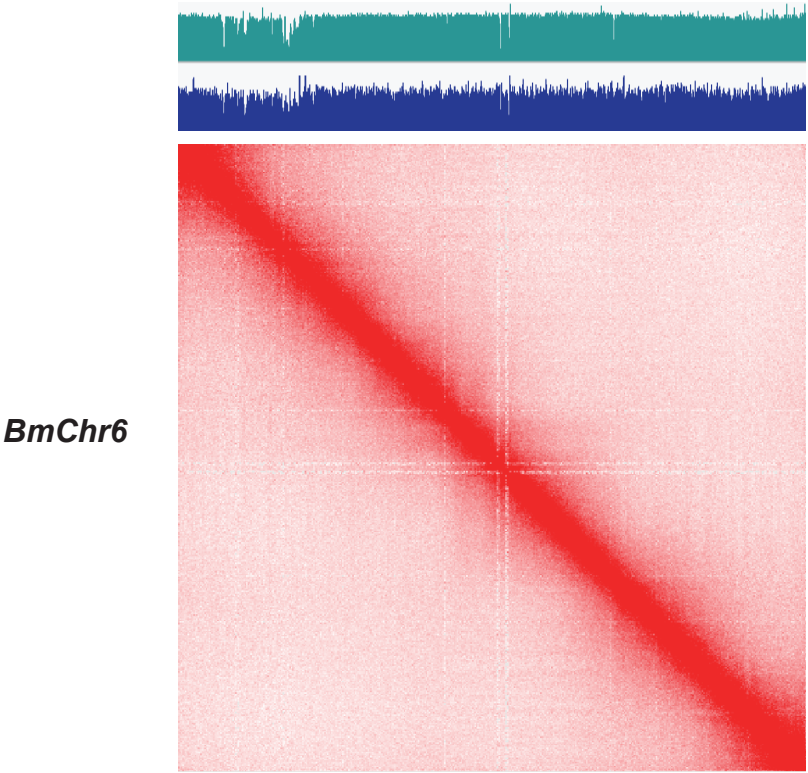

Supplement: s1 [file s1]

Figure S6

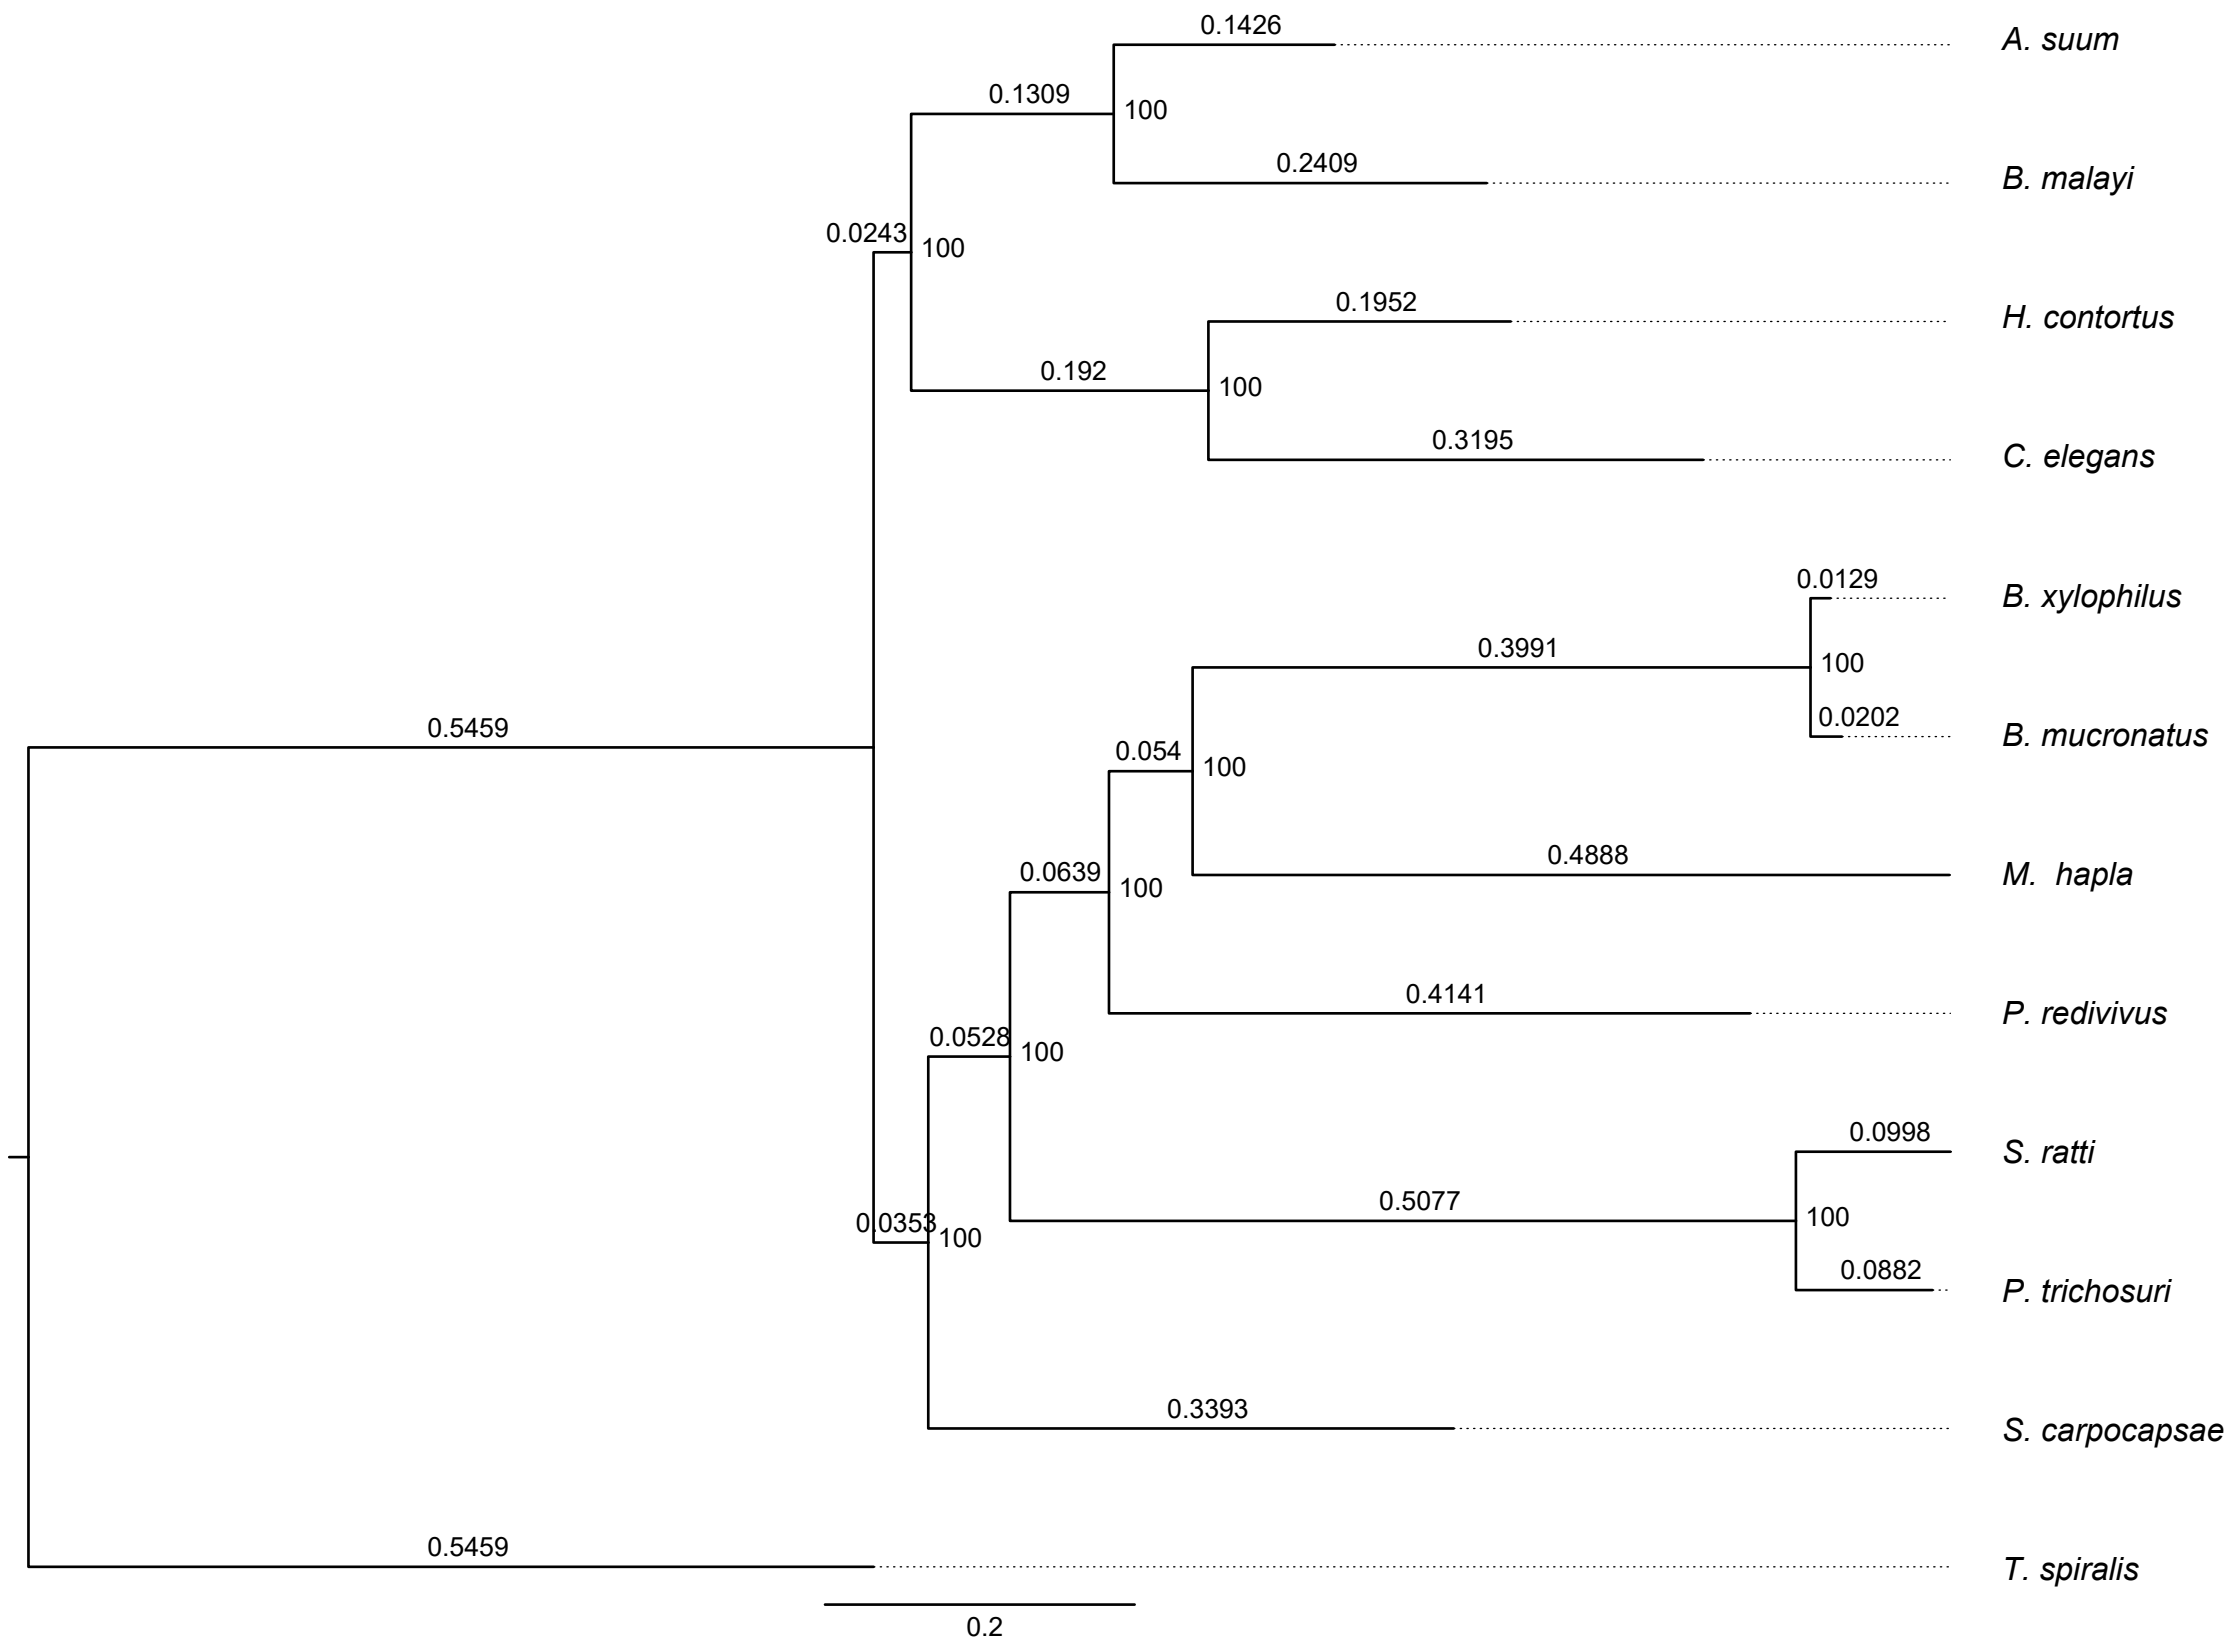

Supplement: s1 [file s1]

## Figure S10

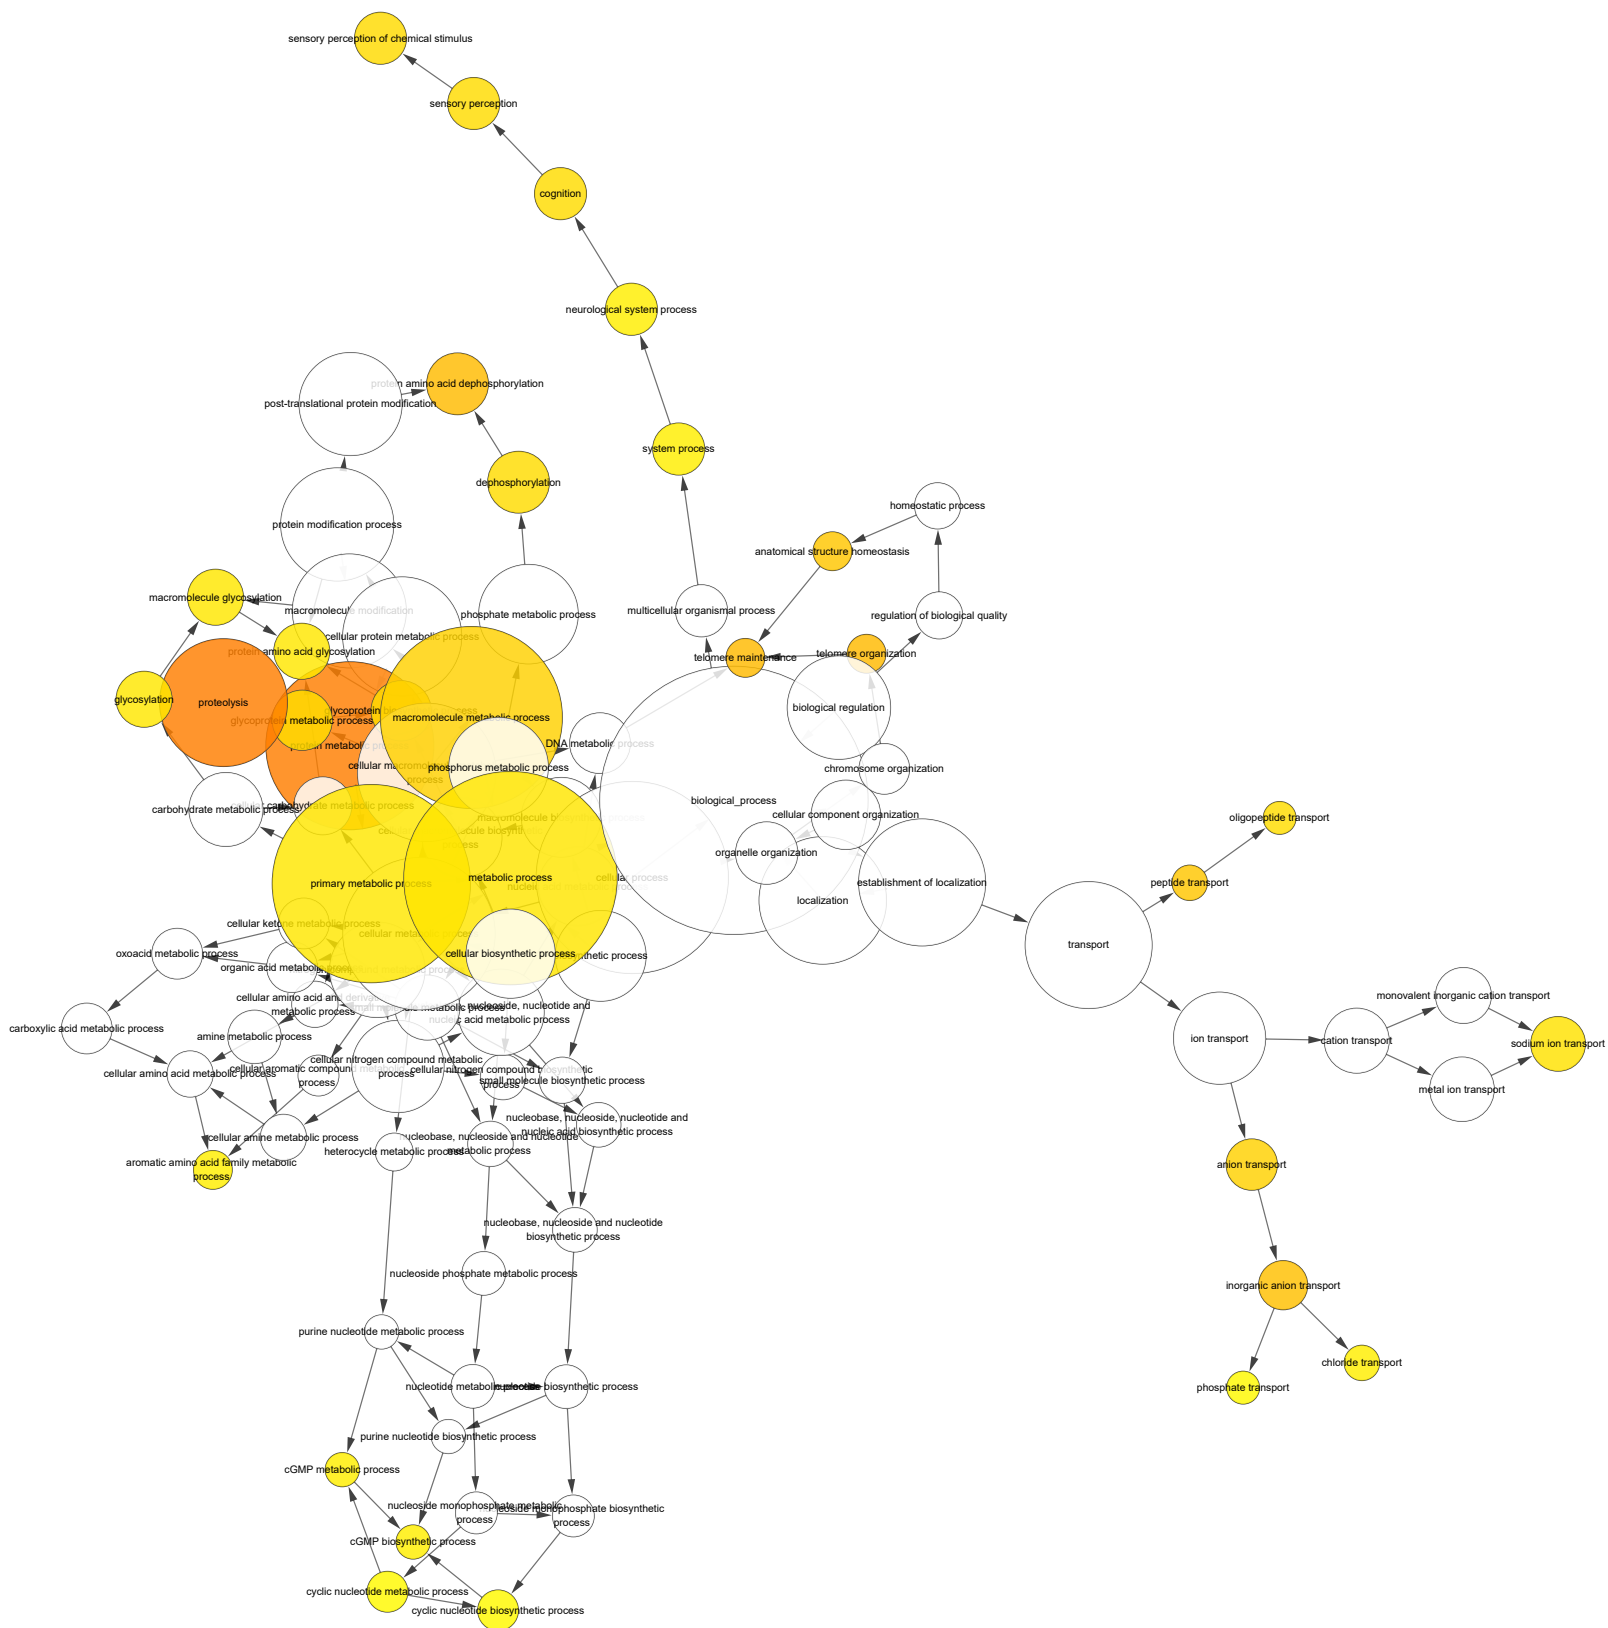

Supplement: s1 [file s1]

## Figure S3

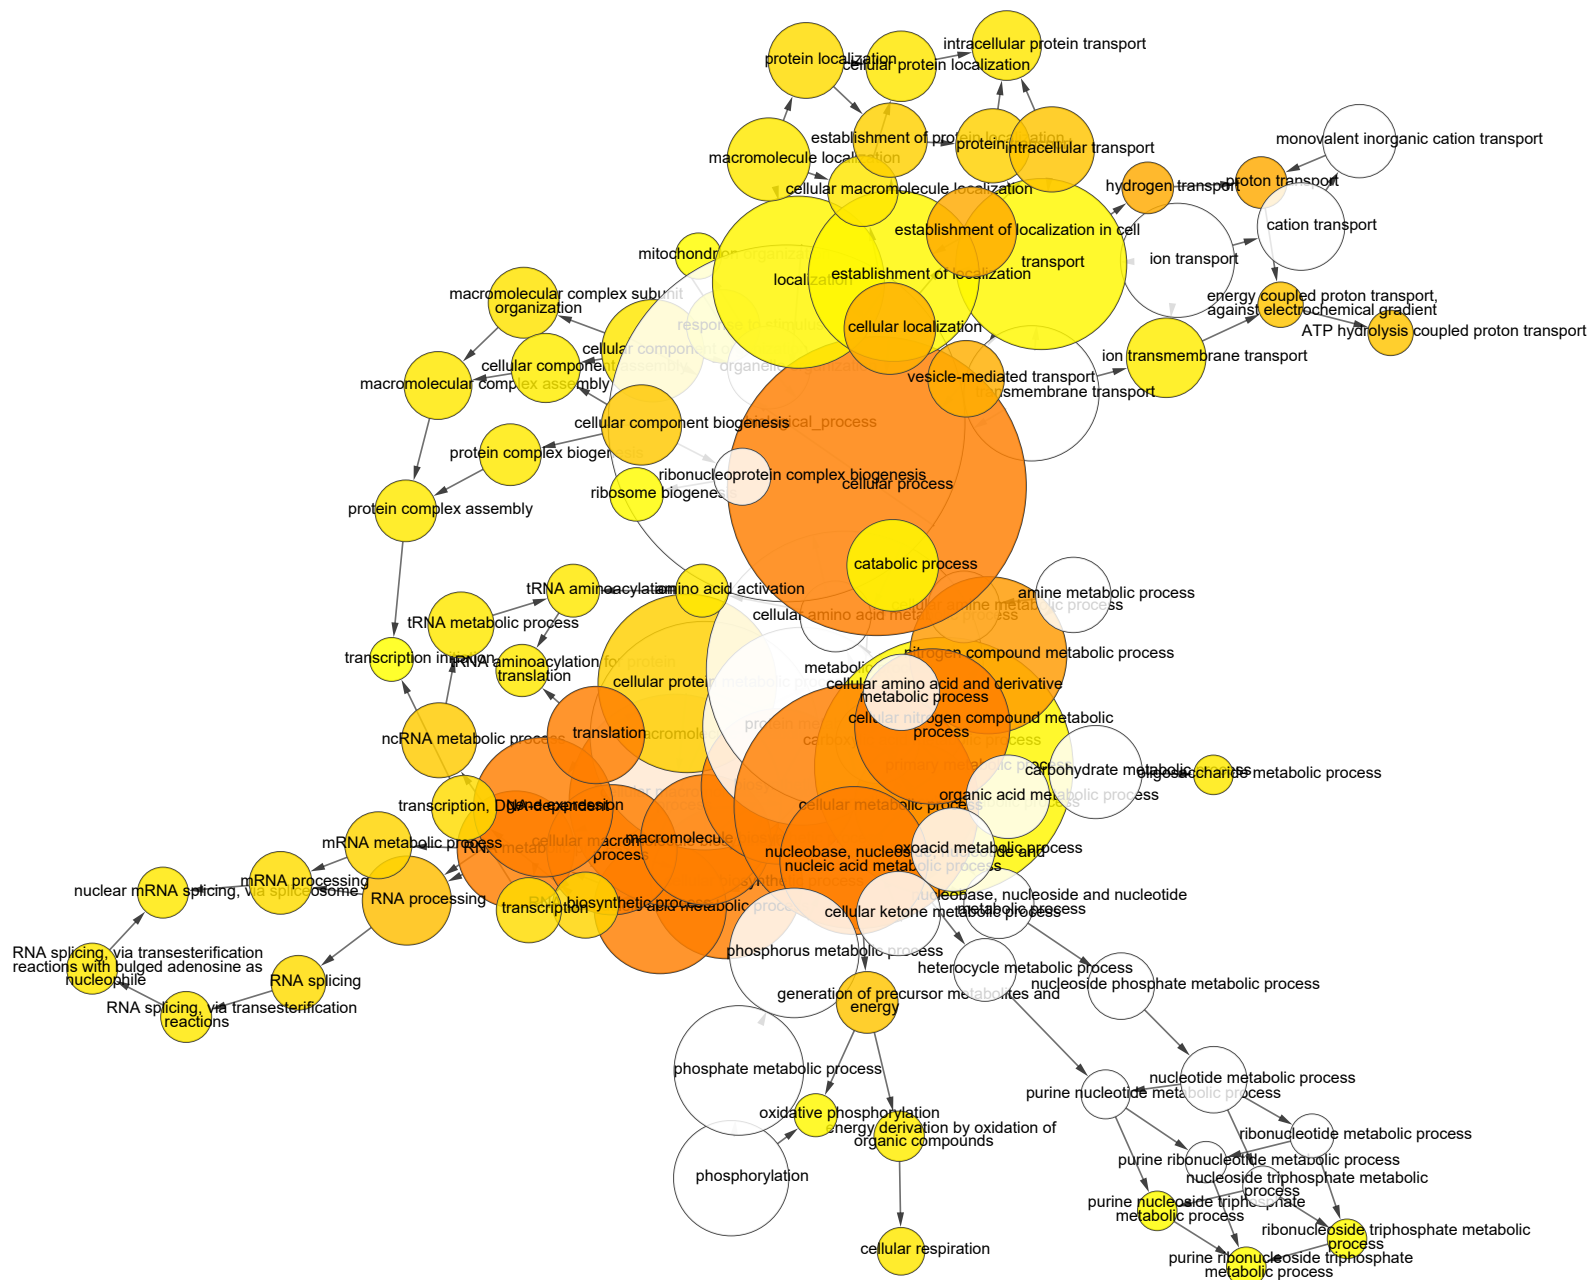

Supplement: s1 [file s1]

Figure S12

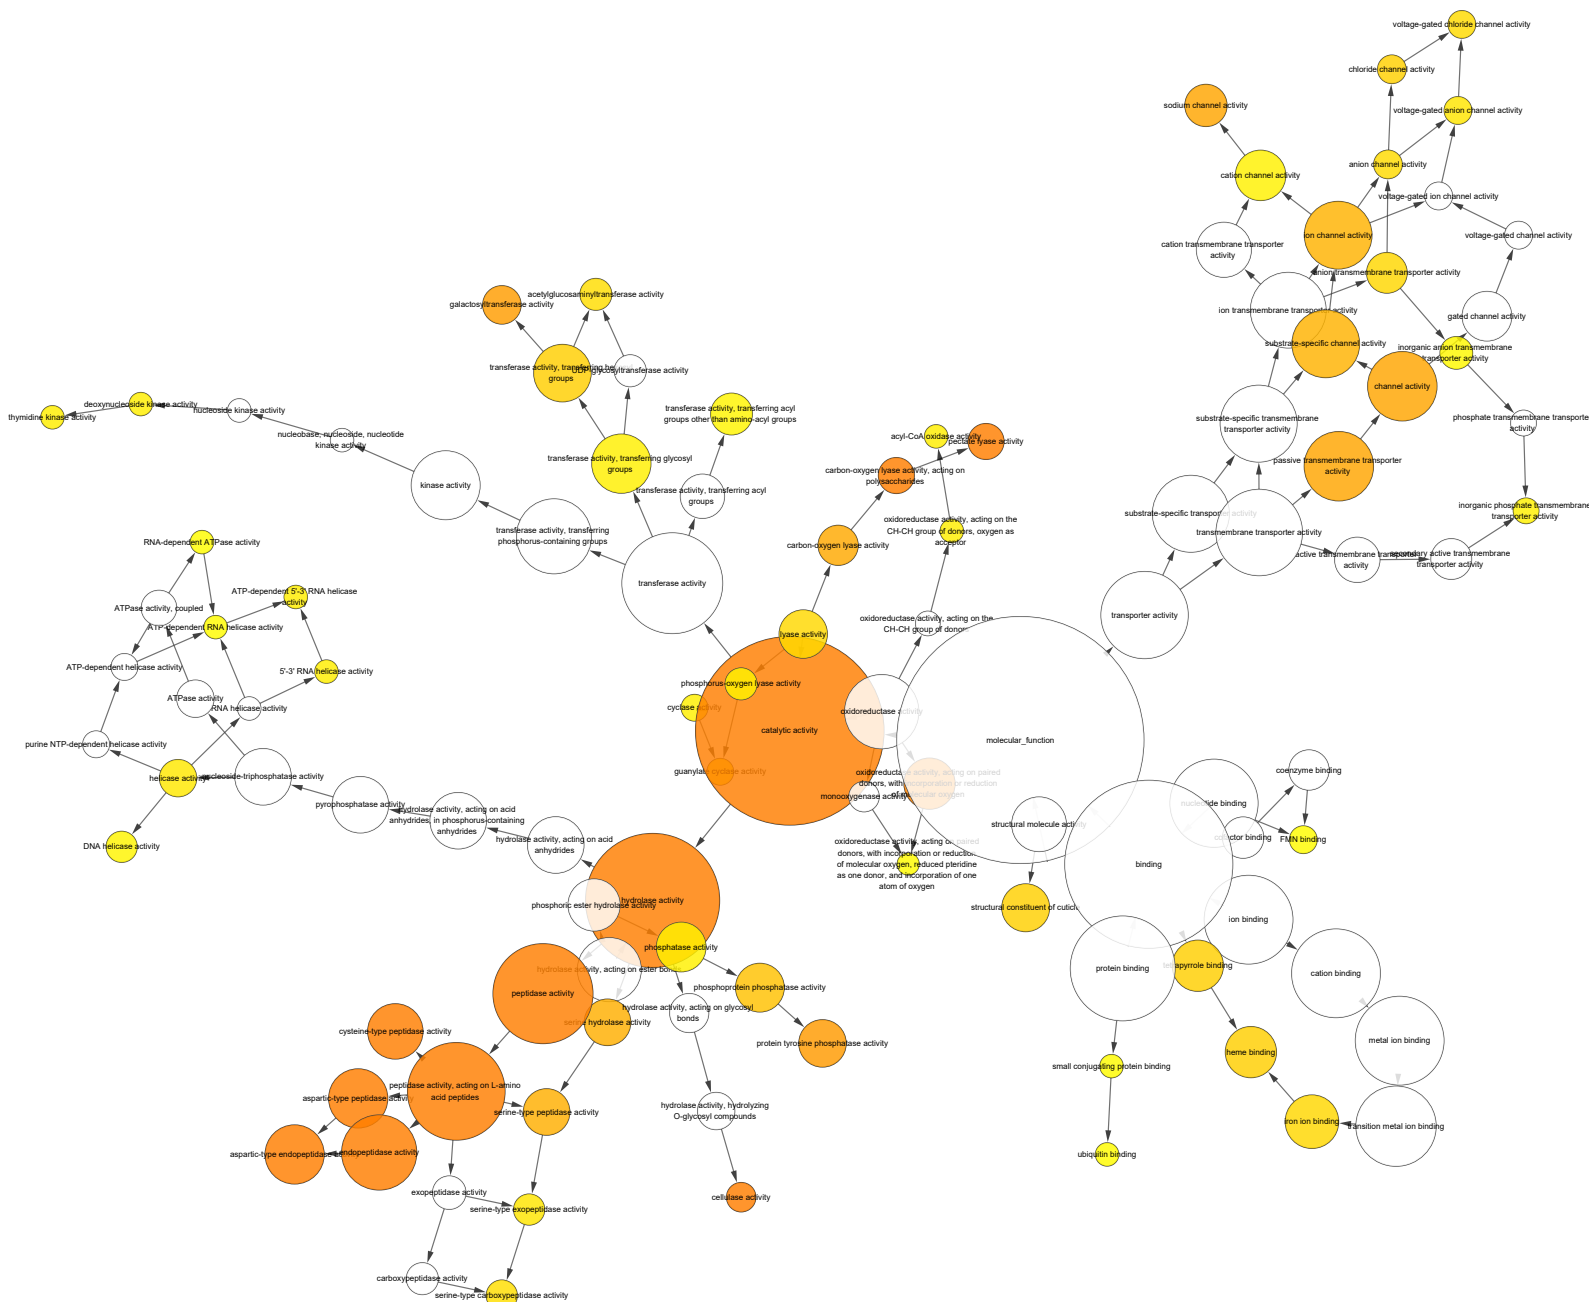

Supplement: s1 [file s1]

Figure S24

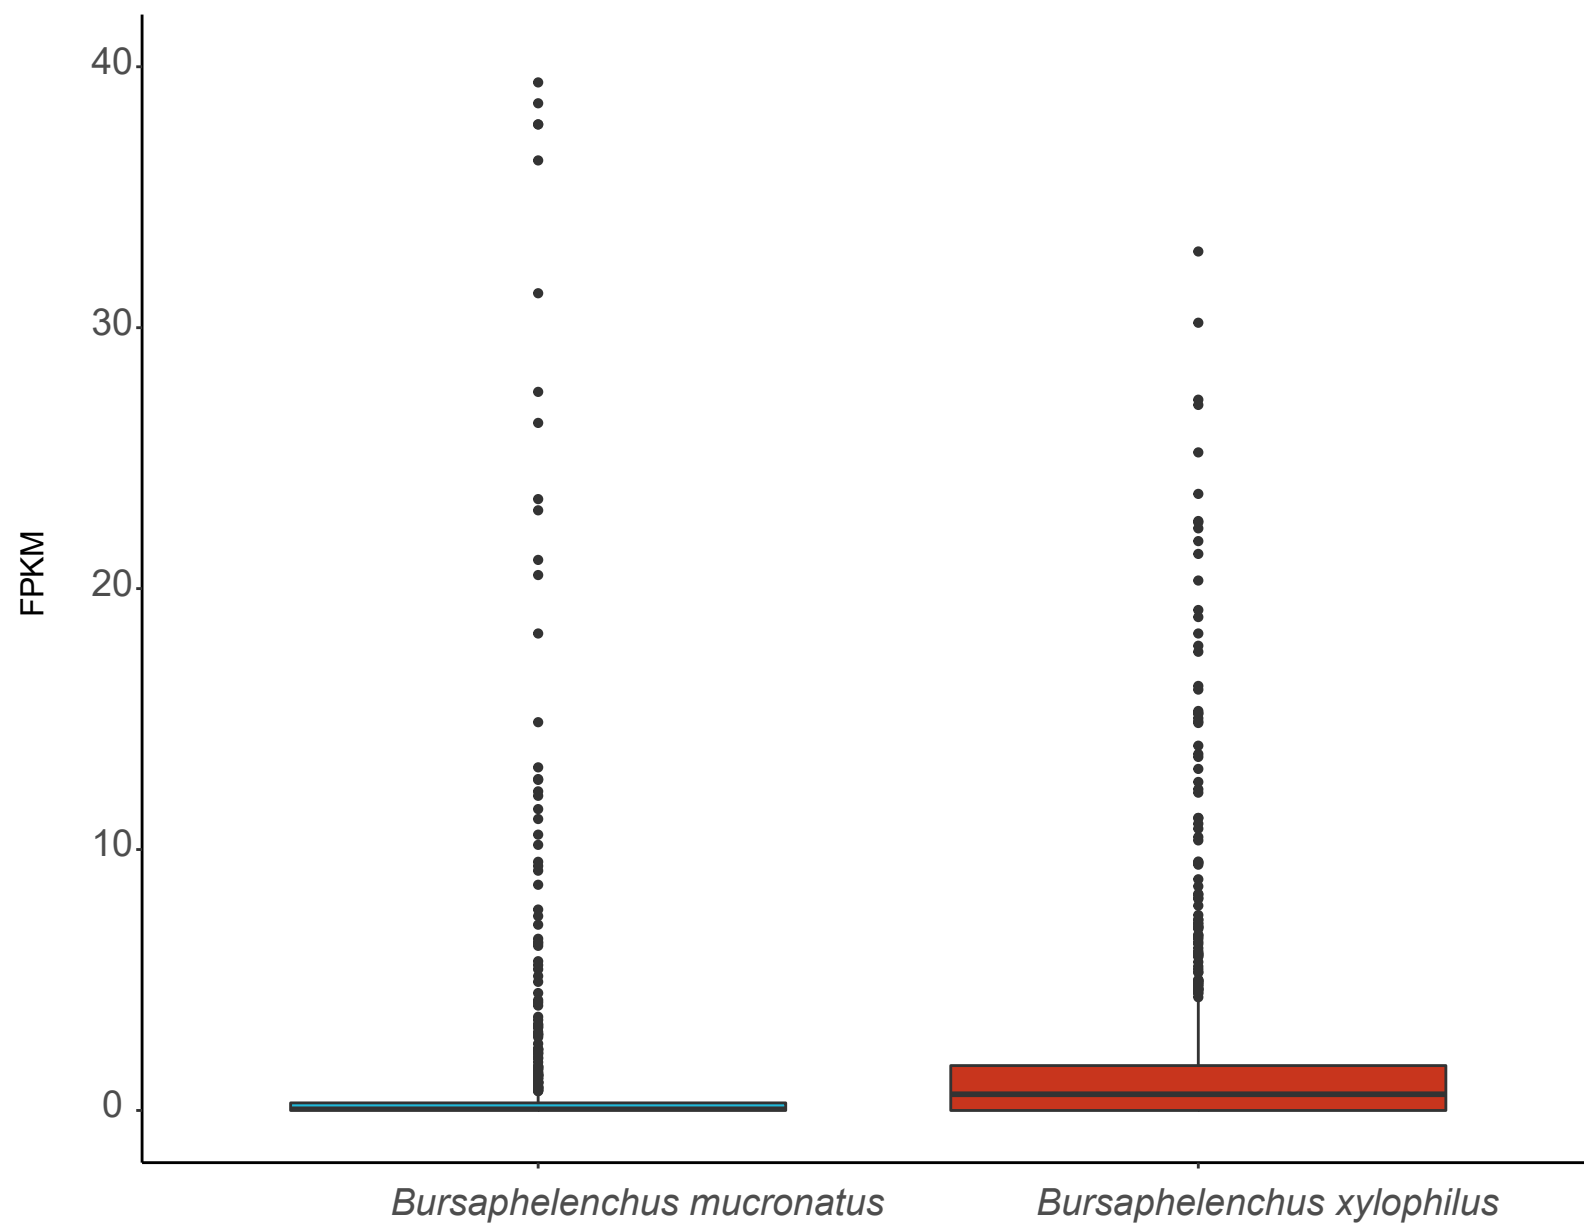

Supplement: s1 [file s1]

## Figure S9

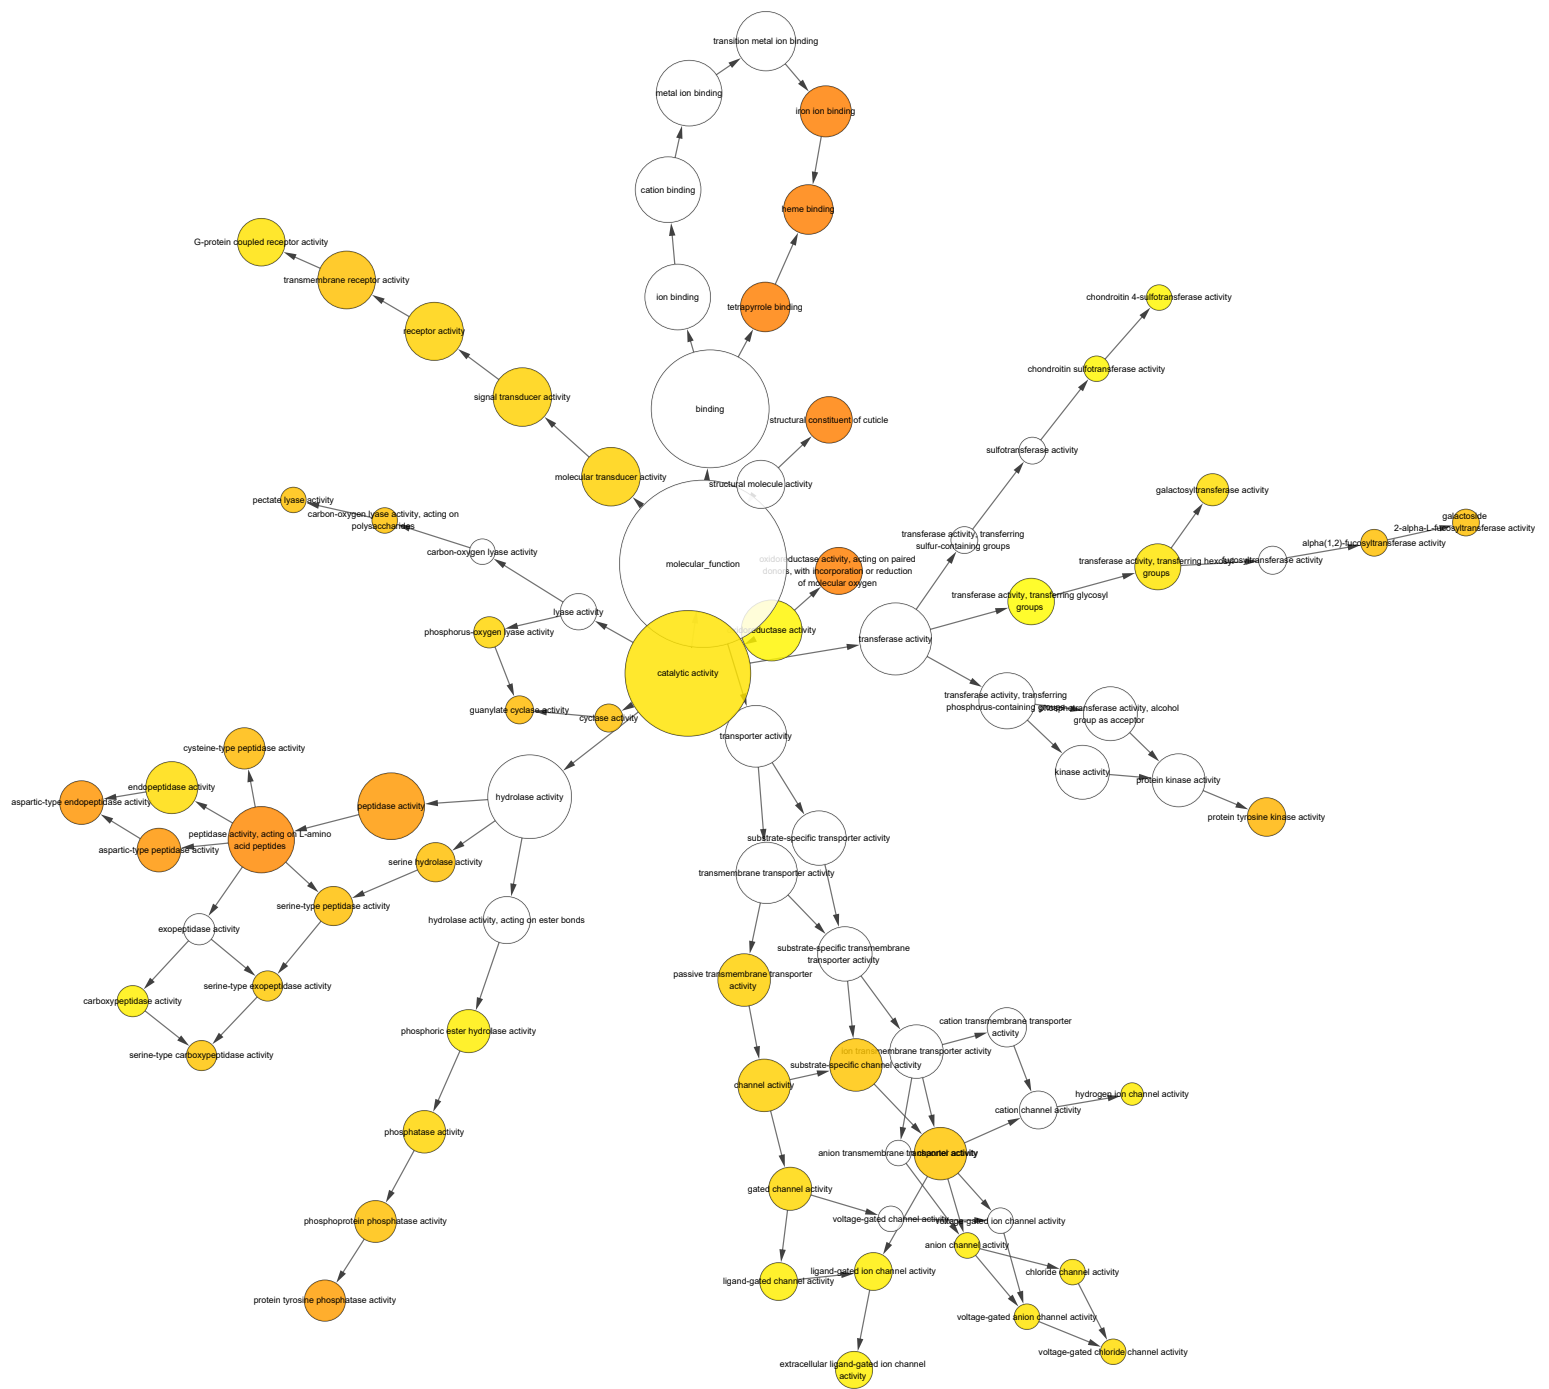

Supplement: s1 [file s1]

Figure S5

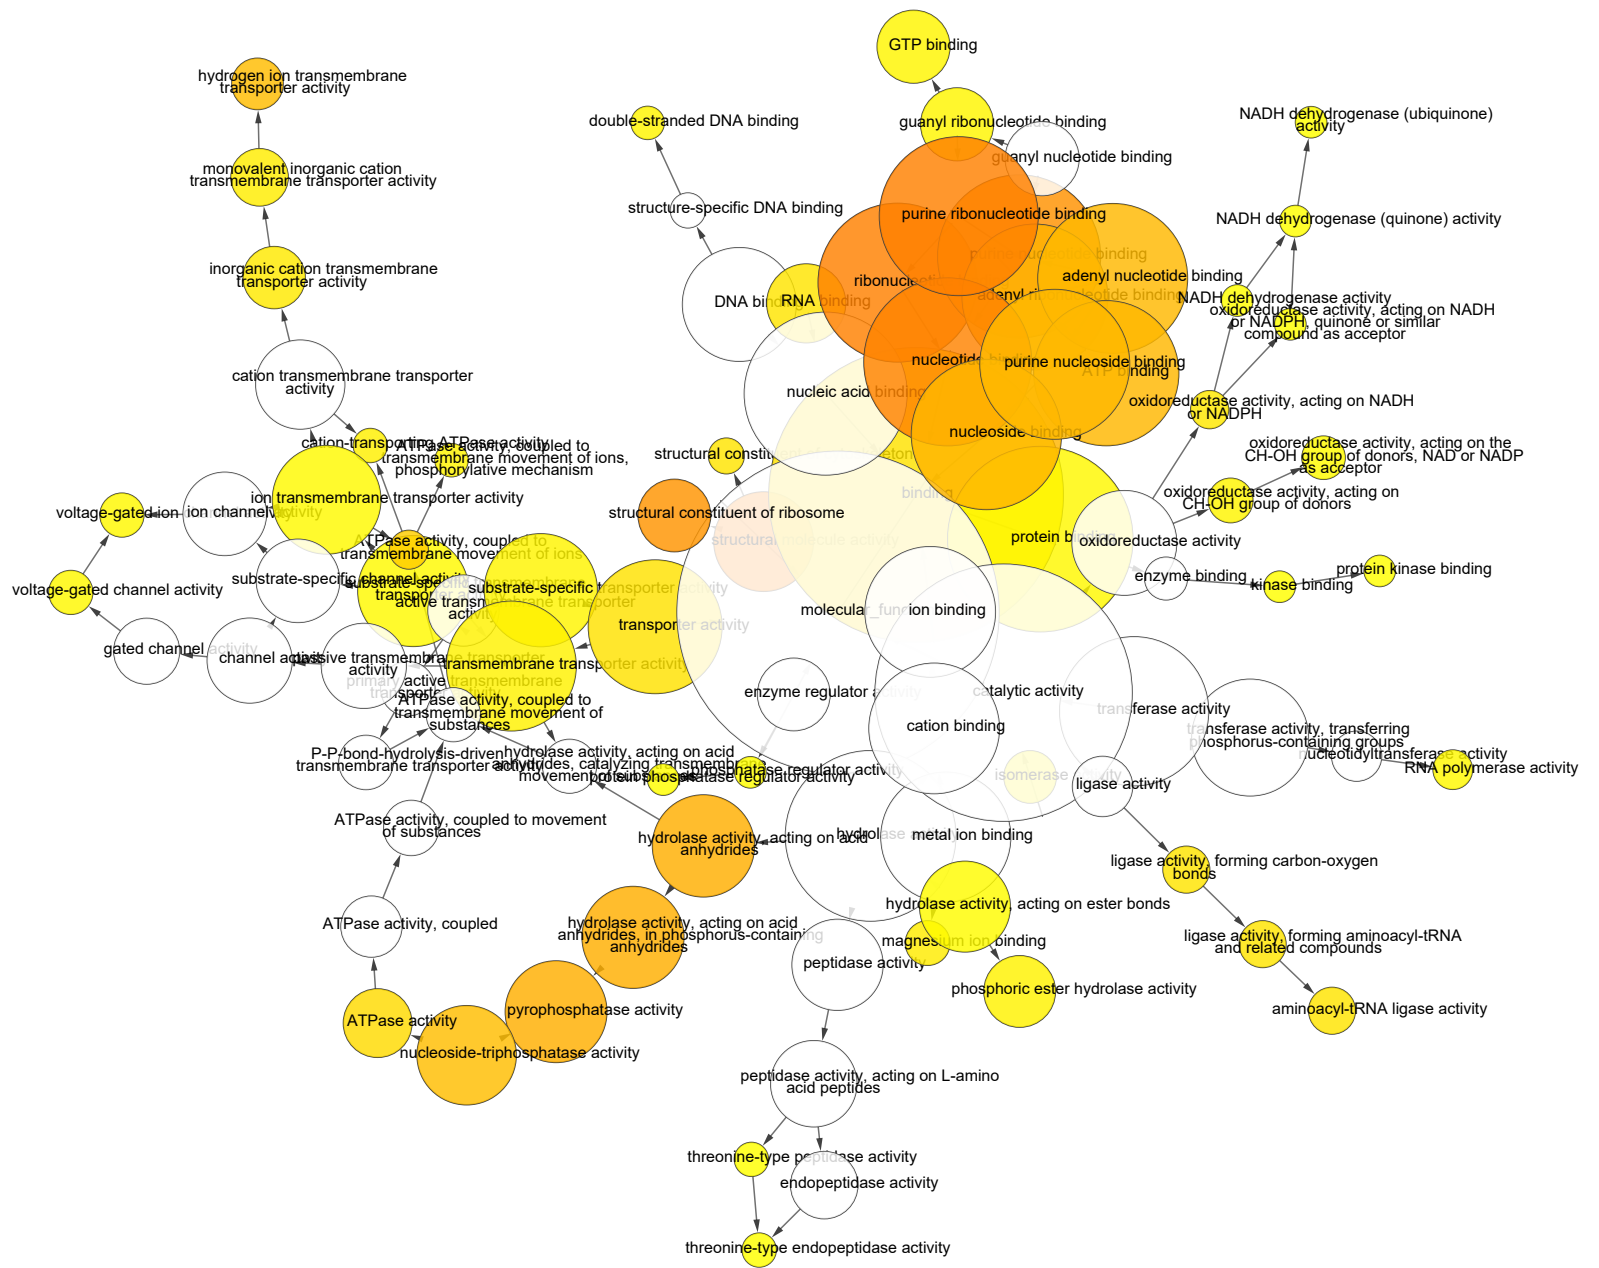

Supplement: s1 [file s1]

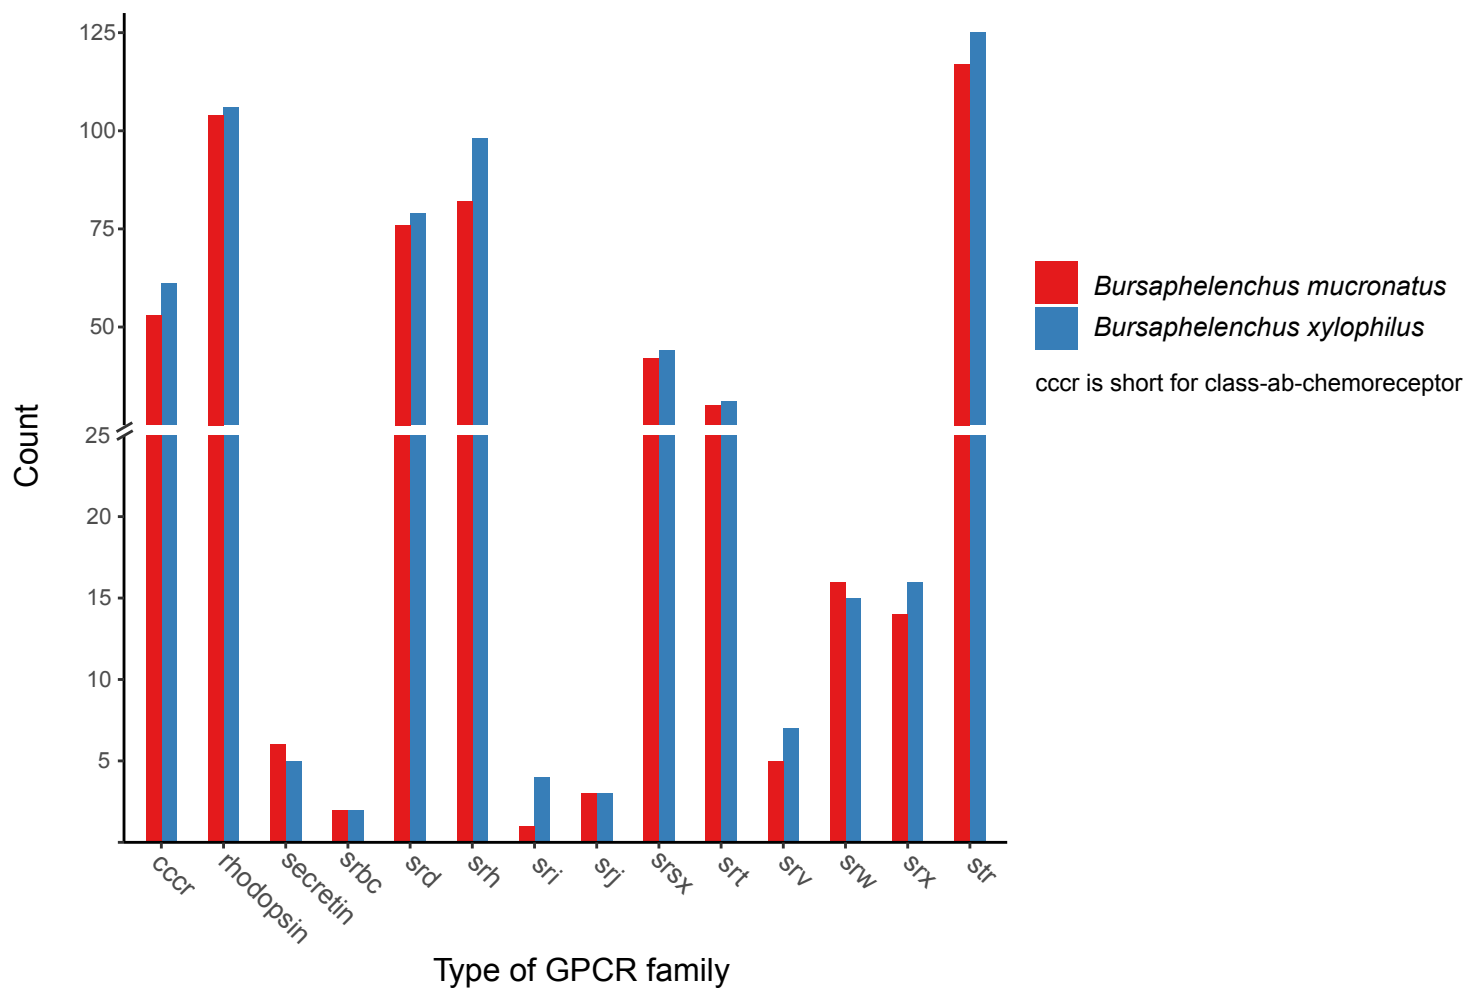

Supplement: s1 [file s1]

Figure S11

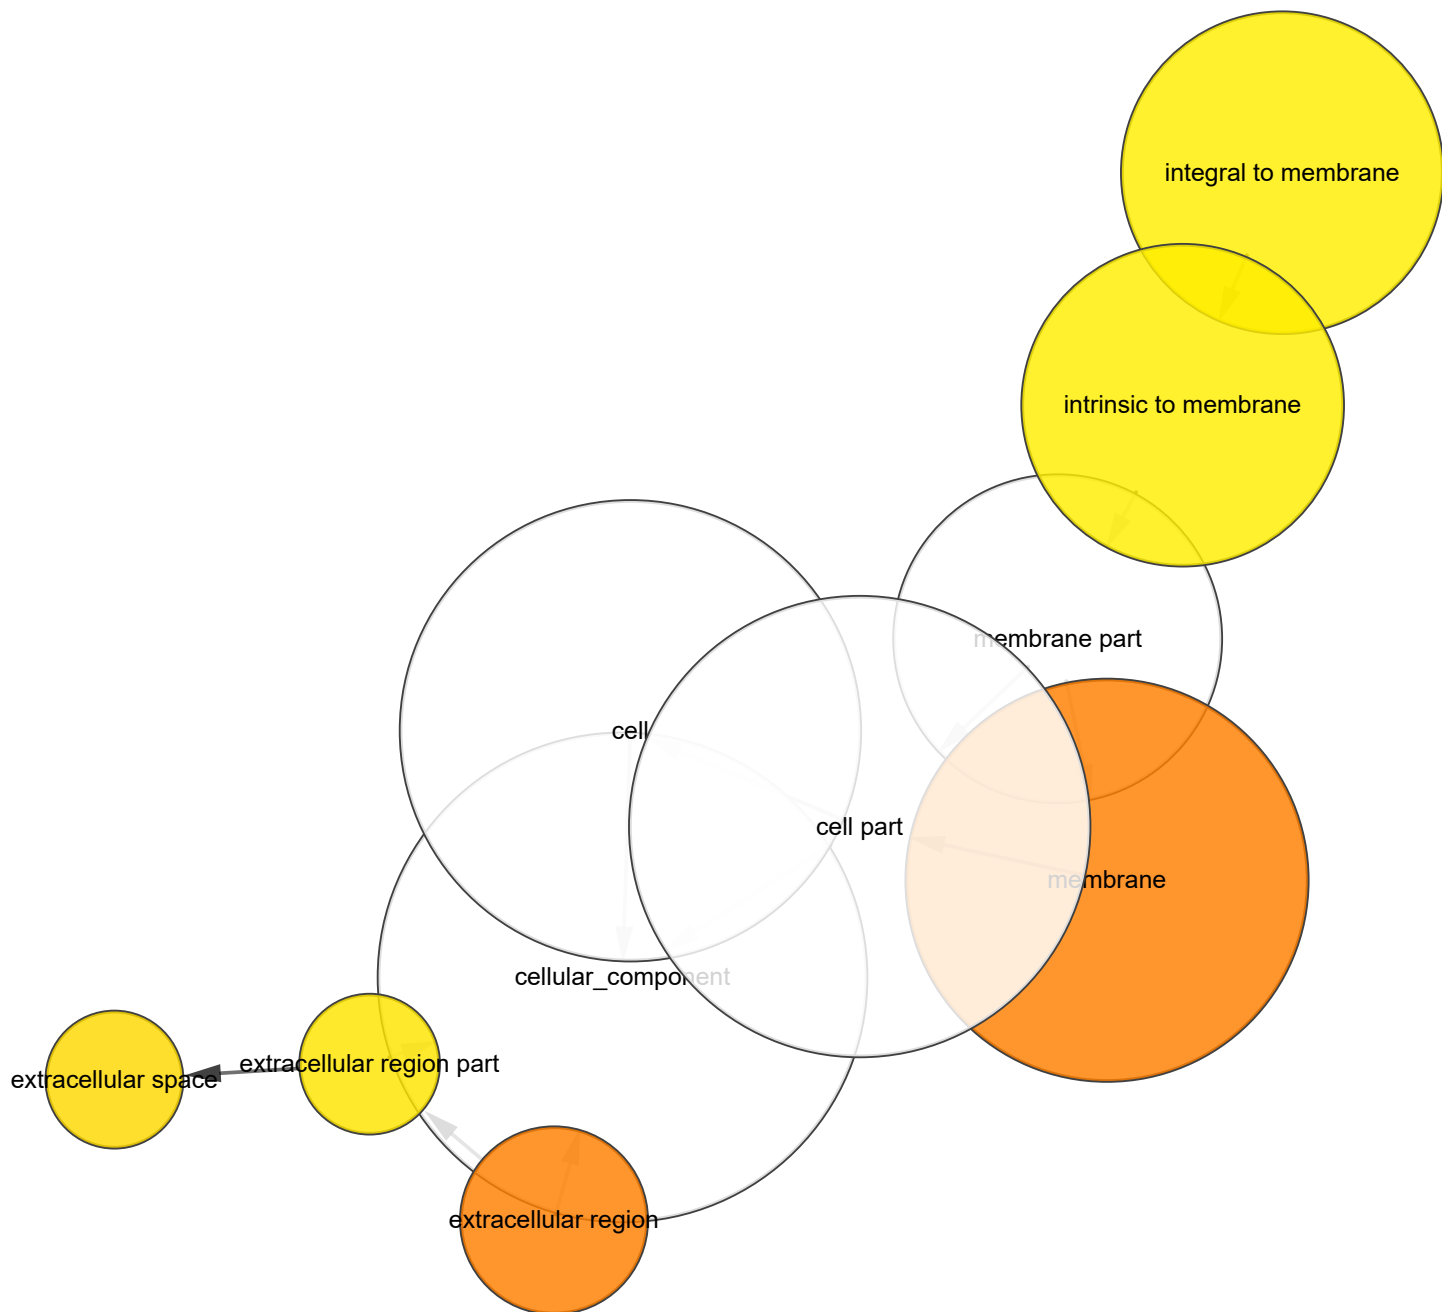

Supplement: s1 [file s1]

Figure S4

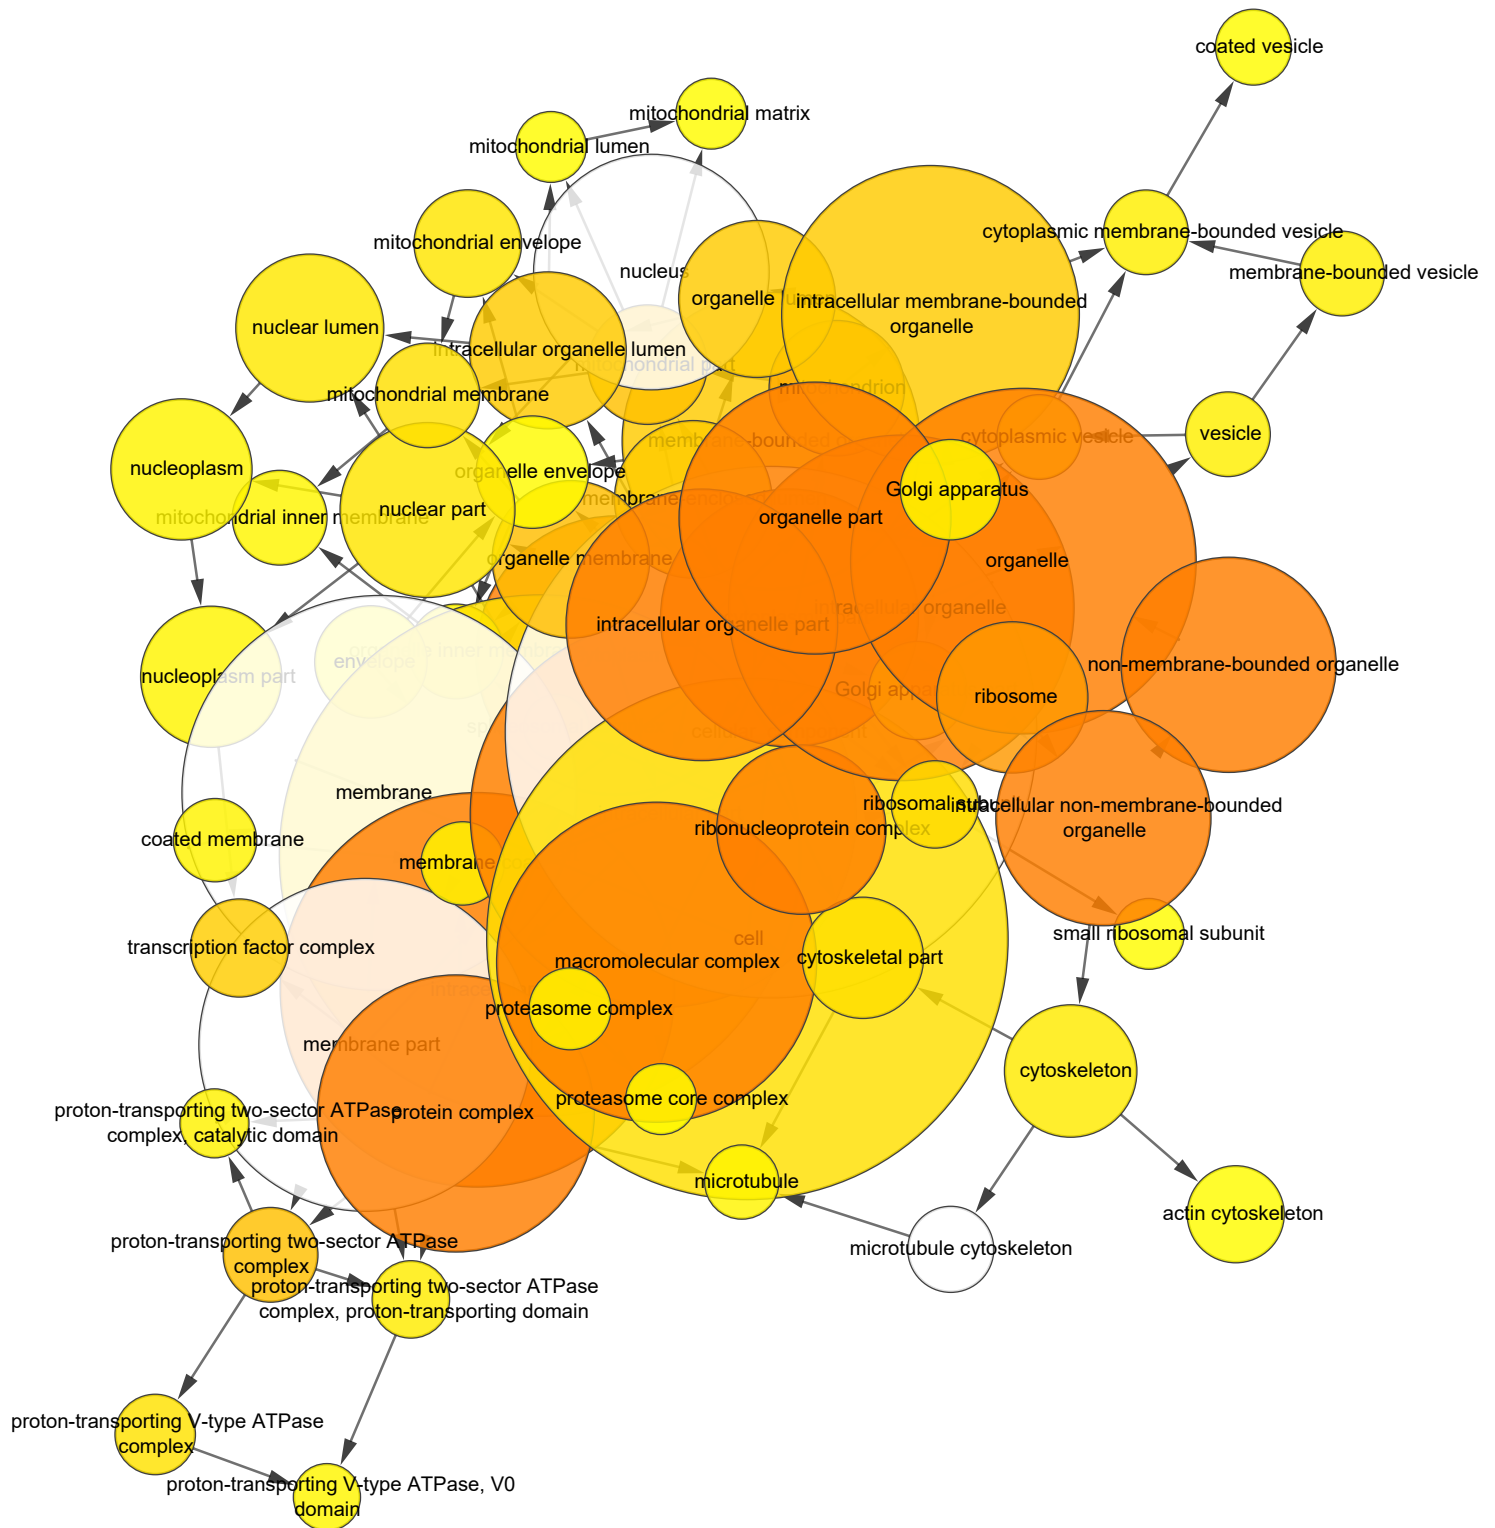

Supplement: s1 [file s1]

Figure S1

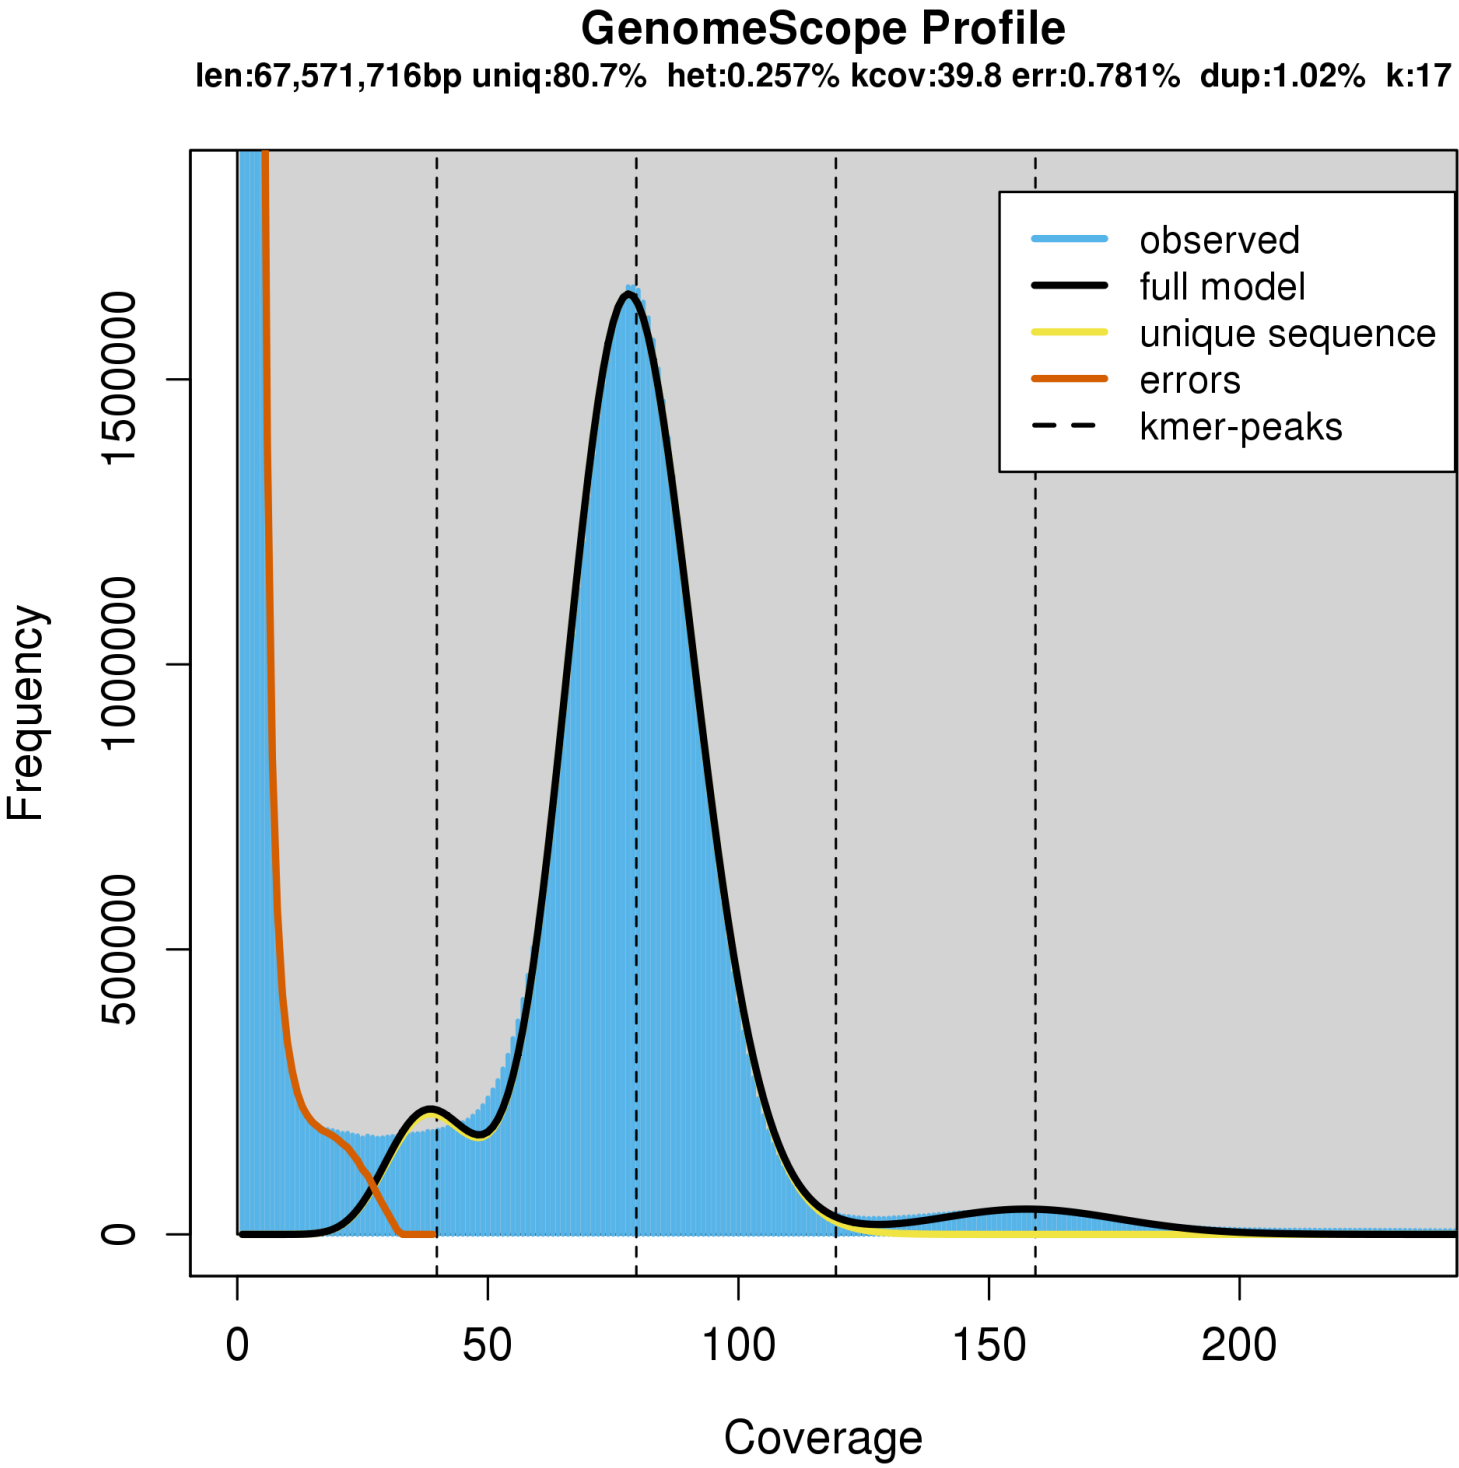

Supplement: s1 [file s1]

Figure S8

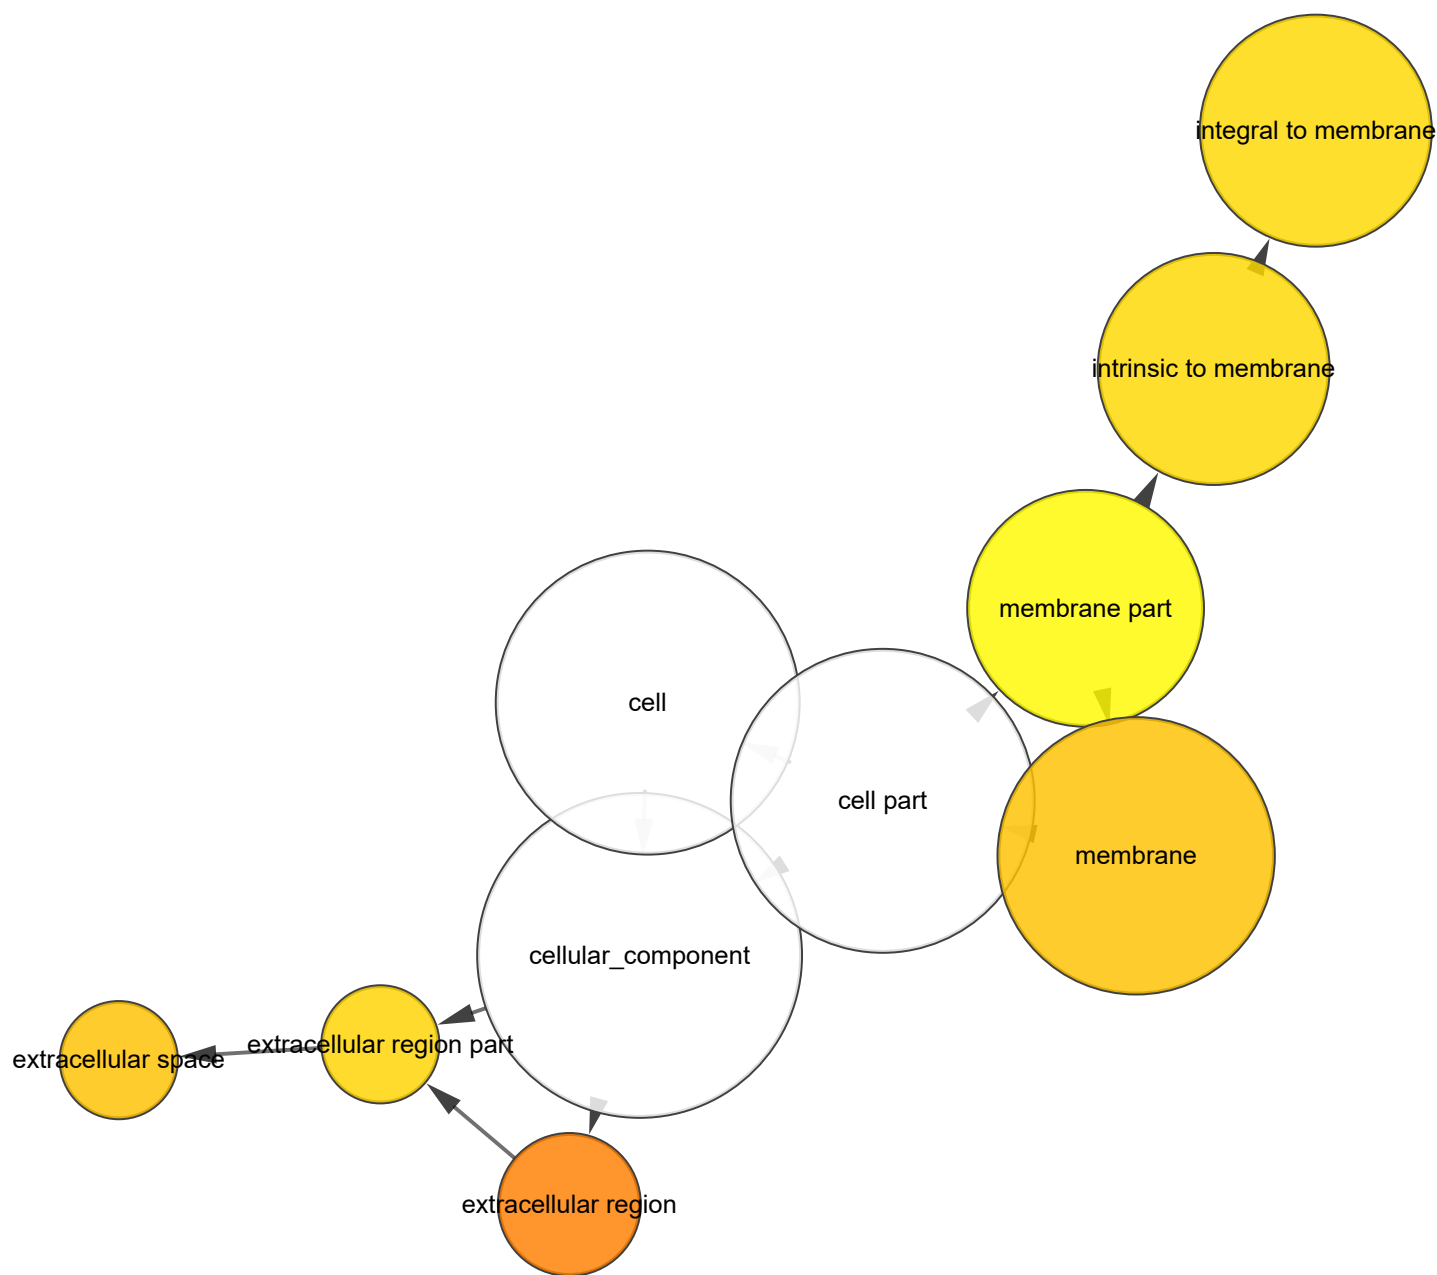

Supplement: s1 [file s1]

Figure S7

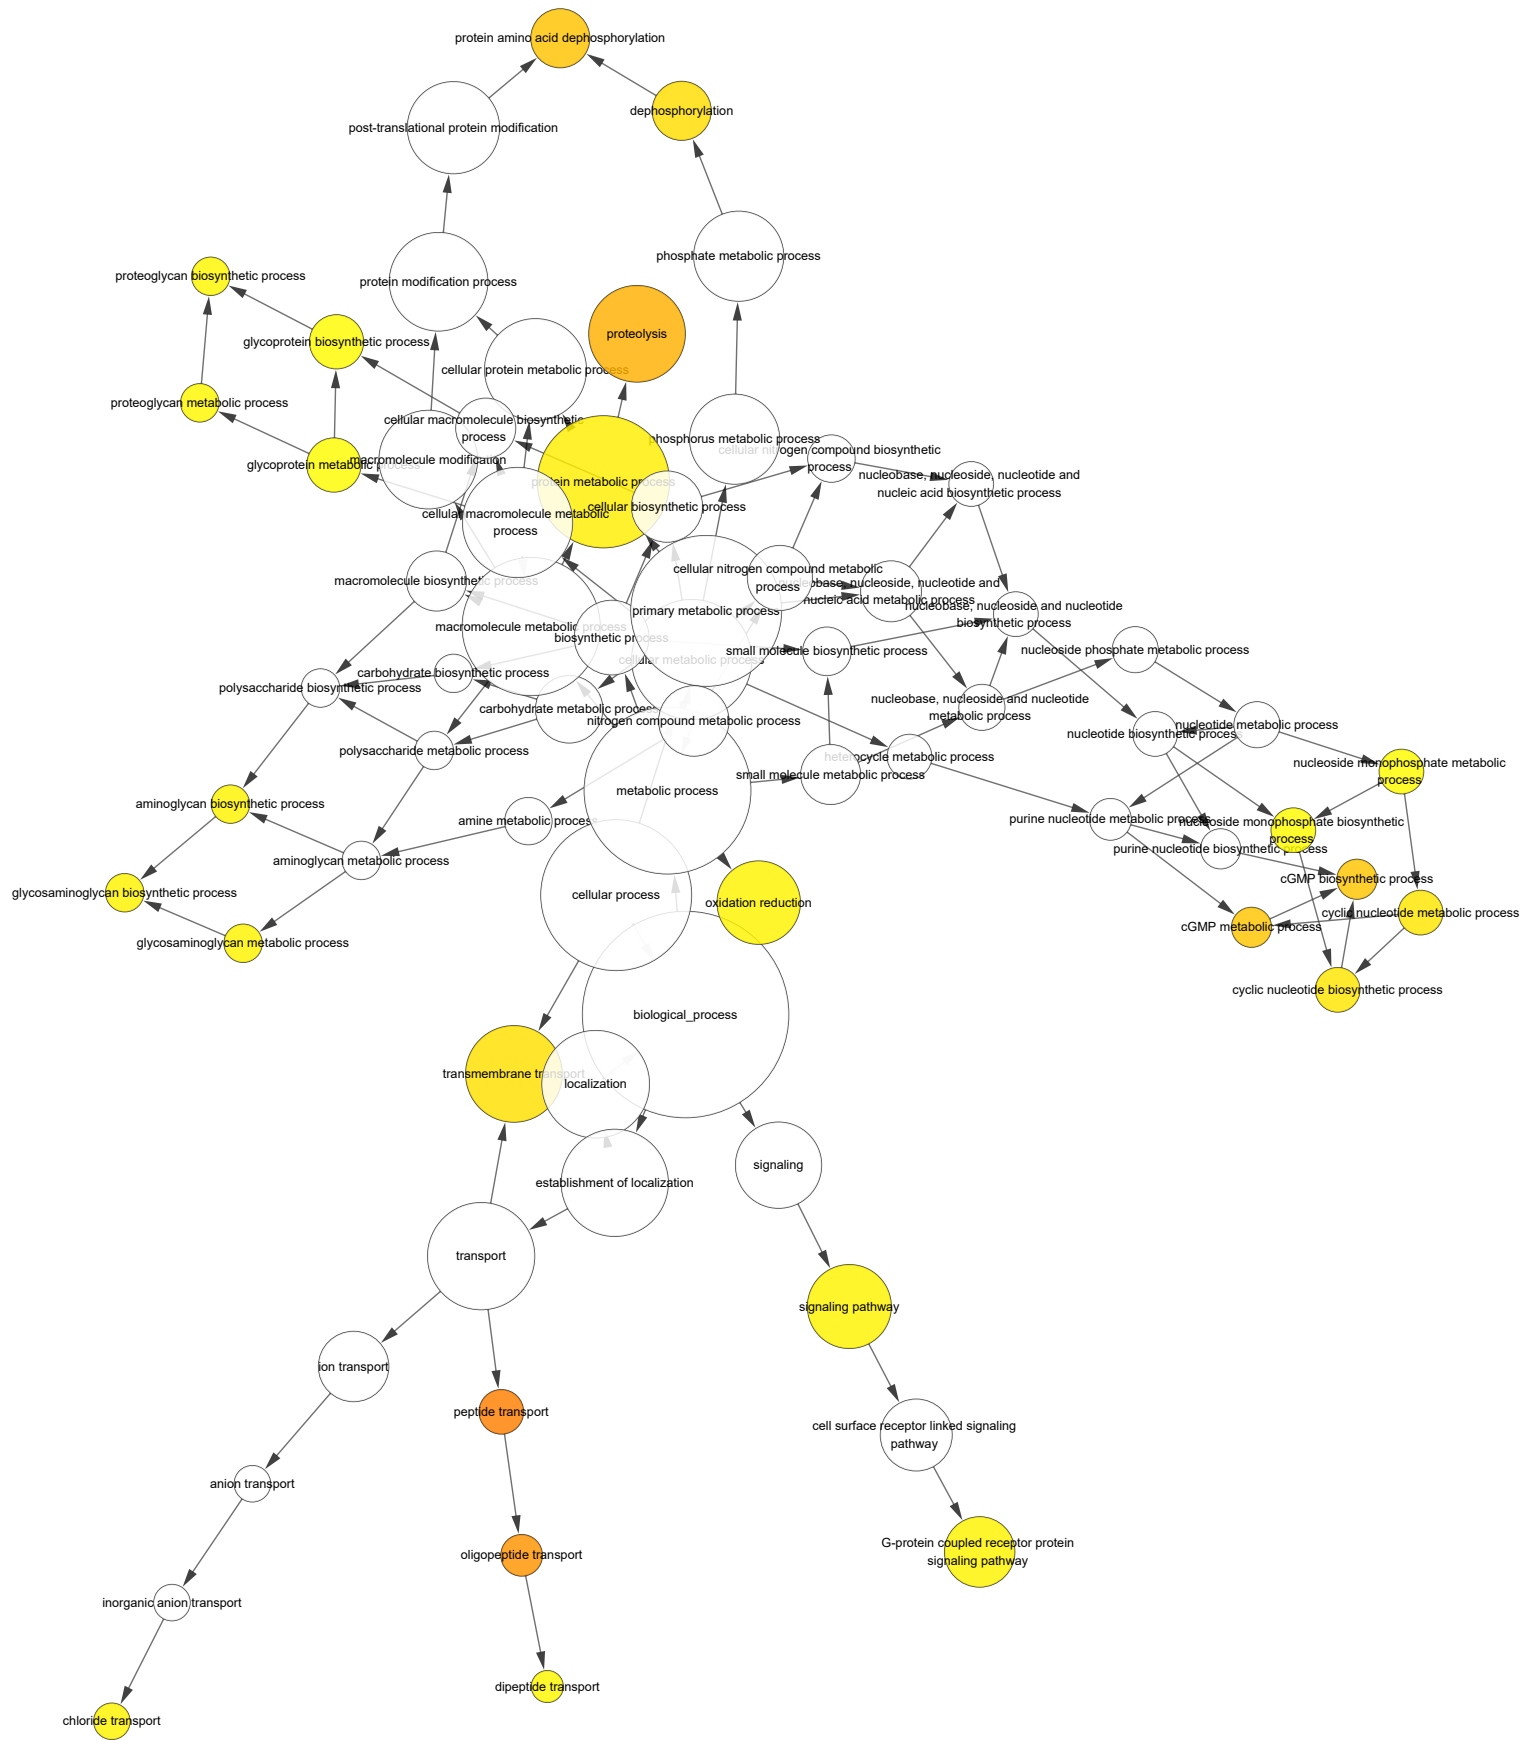

Supplement: s1 [file s1]
